# Supplementary material for: Fibroblast MMP14-Dependent Collagen Processing Is Necessary for Melanoma Growth
Source: MDPI journal article supplement (doi:10.3390/cancers13081984), 2021-04-20
Supplement: s1 [file s1]

## Supplementary Materials:

# Fibroblast MMP14-Dependent Collagen Processing is Necessary for Melanoma Growth

Elke Pach, Jürgen Brinckmann, Matthias Rübsam, Maike Kümper, Cornelia Mauch and Paola Zigrino

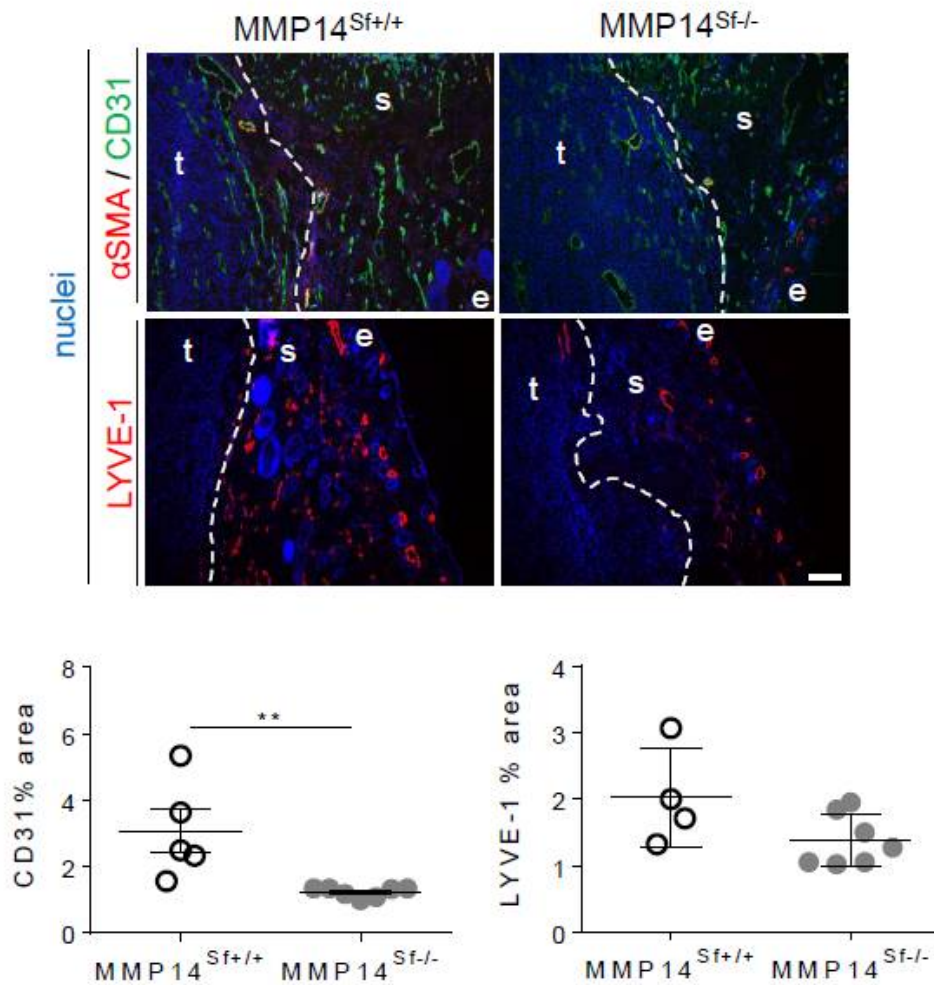

**Figure S1.** Immunofluorescence staining for CD31 (green) and LYVE-1 (red) of tumor–stroma tissue. The graphs depict the average positive cells in percentages. Note: \*\*  $p < 0.01$ ;  $MMP14^{Sf+/+}$   $n = 4-5$ ;  $MMP14^{Sf-/-}$   $n = 7$ ; e: epidermis; s: stroma; t: tumor; scale: 100  $\mu$ m.

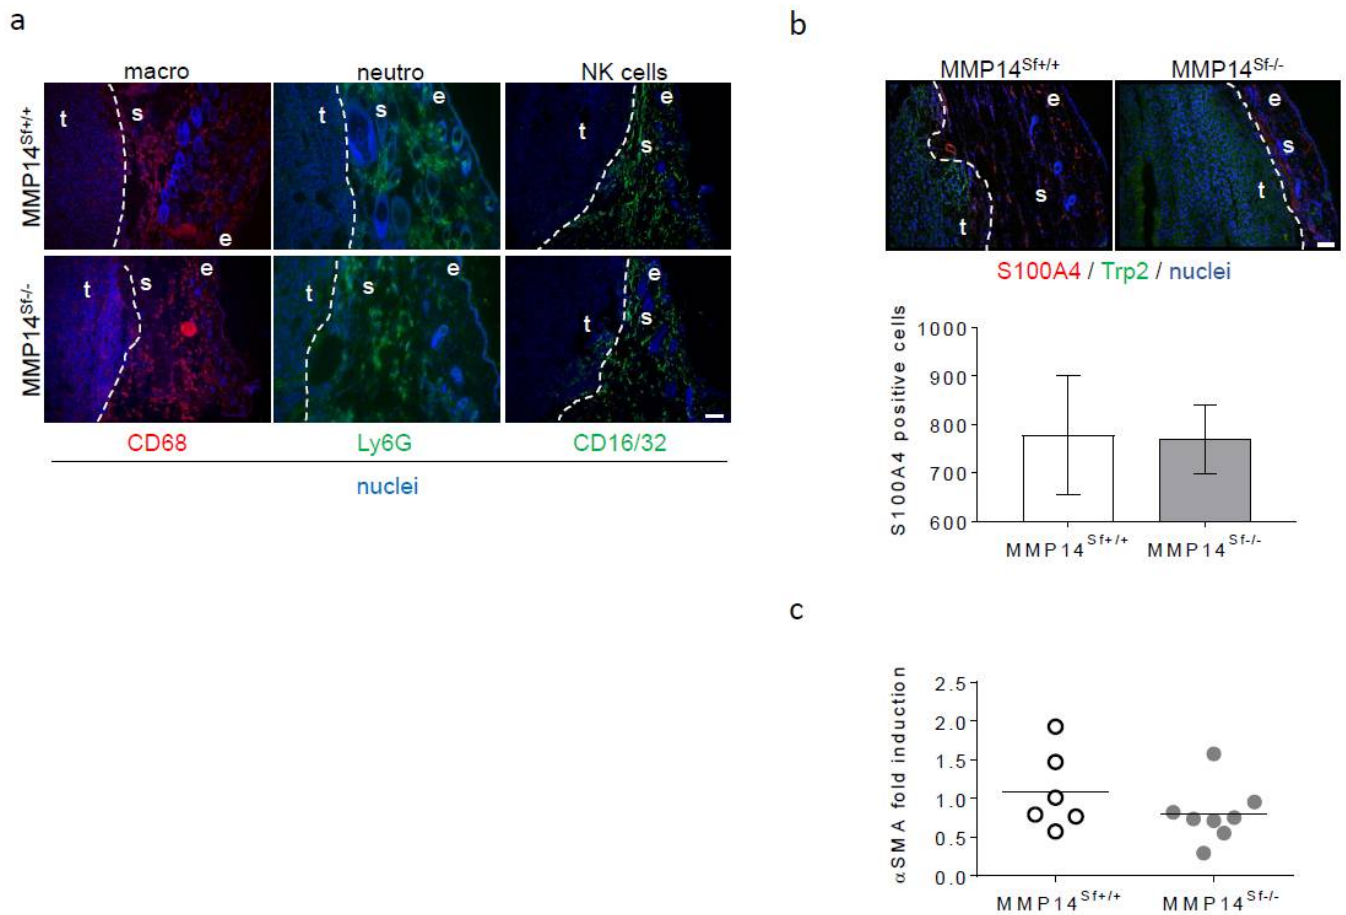

**Figure S2.** (a) Immunofluorescence staining for macrophages (macro, CD68, red), neutrophils (neutro, Ly6G, green), and NK cells (CD16/32, green) of tumor-stroma tissue. (b) Immunofluorescence staining for S100A4 (red) and the melanoma marker Trp2 (tyrosine-related protein 2, green) of tumor-stroma tissue. The graph depicts S100A4-positive cells. MMP14<sup>St+/+</sup>  $n = 7$ ; MMP14<sup>St-/-</sup>  $n = 5$ . (c) Transcriptional analysis of  $\alpha$ SMA in peritumoral tissue. MMP14<sup>St+/+</sup>  $n = 6$ ; MMP14<sup>St-/-</sup>  $n = 8$ ; e: epidermis; s: stroma; t: tumor; scale: 100  $\mu$ m.

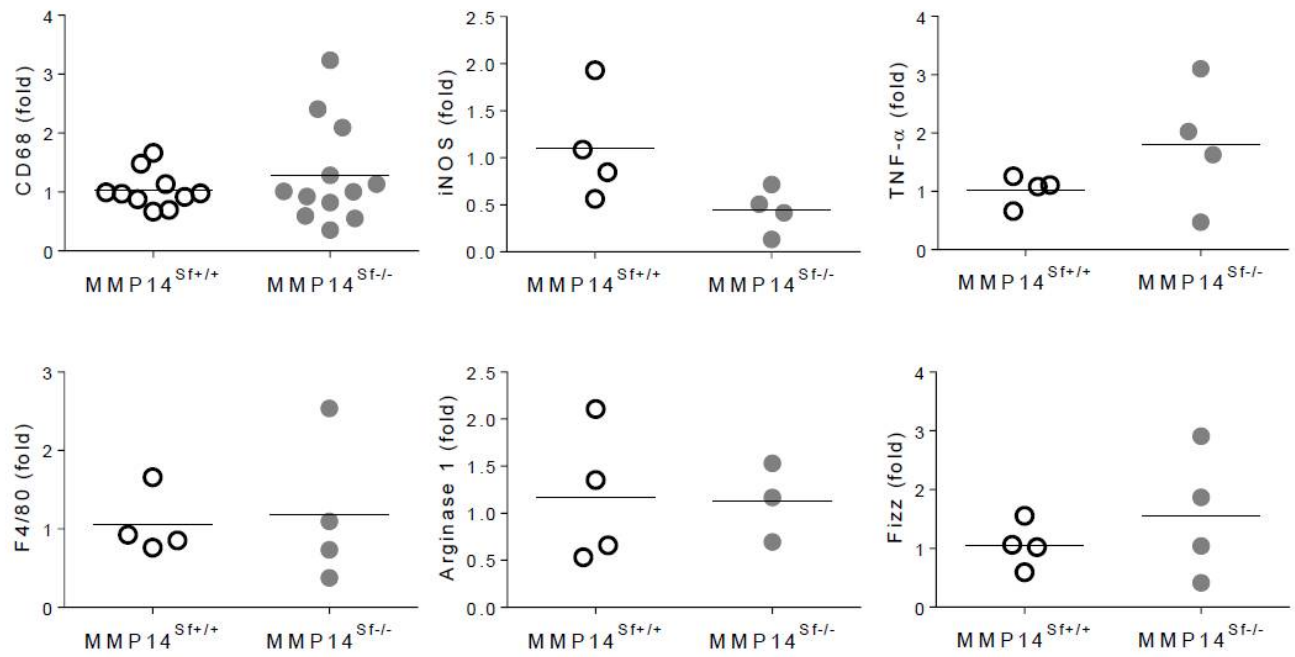

**Figure S3.** Transcriptional analysis of markers for macrophages (CD68 and F4/80) and for M1 (iNOS, TNF- $\alpha$ ) and M2 (Arginase1, Fizz) macrophage subtypes in peritumoral tissues. MMP14<sup>Sf+/+</sup>  $n = 4-10$ ; MMP14<sup>Sf-/-</sup>  $n = 3-12$ .

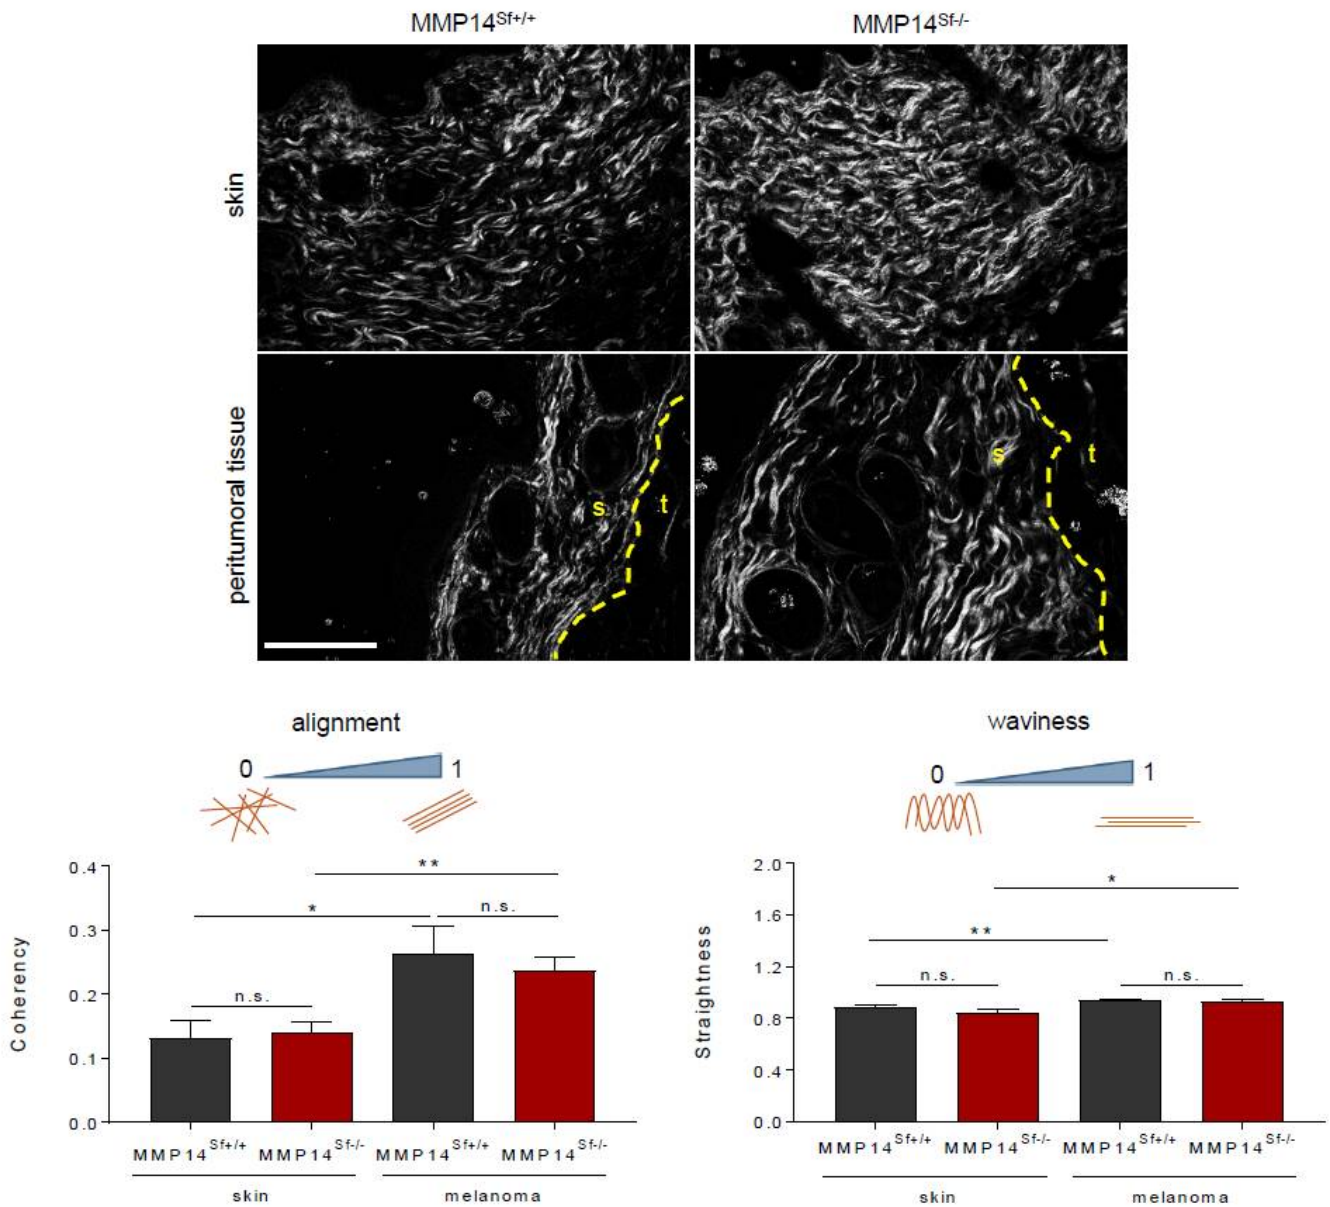

**Figure S4.** Second harmonics generation analysis of skin and peritumoral tissue. Collagen fiber alignment and waviness were determined using coherency (alignment) and straightness (waviness) parameters, with average quantifications shown in the graphs. Peritumoral tissue (melanoma); scale: 100  $\mu$ m; n.s., not significant; \*  $p < 0.05$ ; \*\*\*  $p < 0.001$ . MMP14<sup>Sf+/+</sup>  $n = 8$ ; MMP14<sup>Sf-/-</sup>  $n = 8$ .

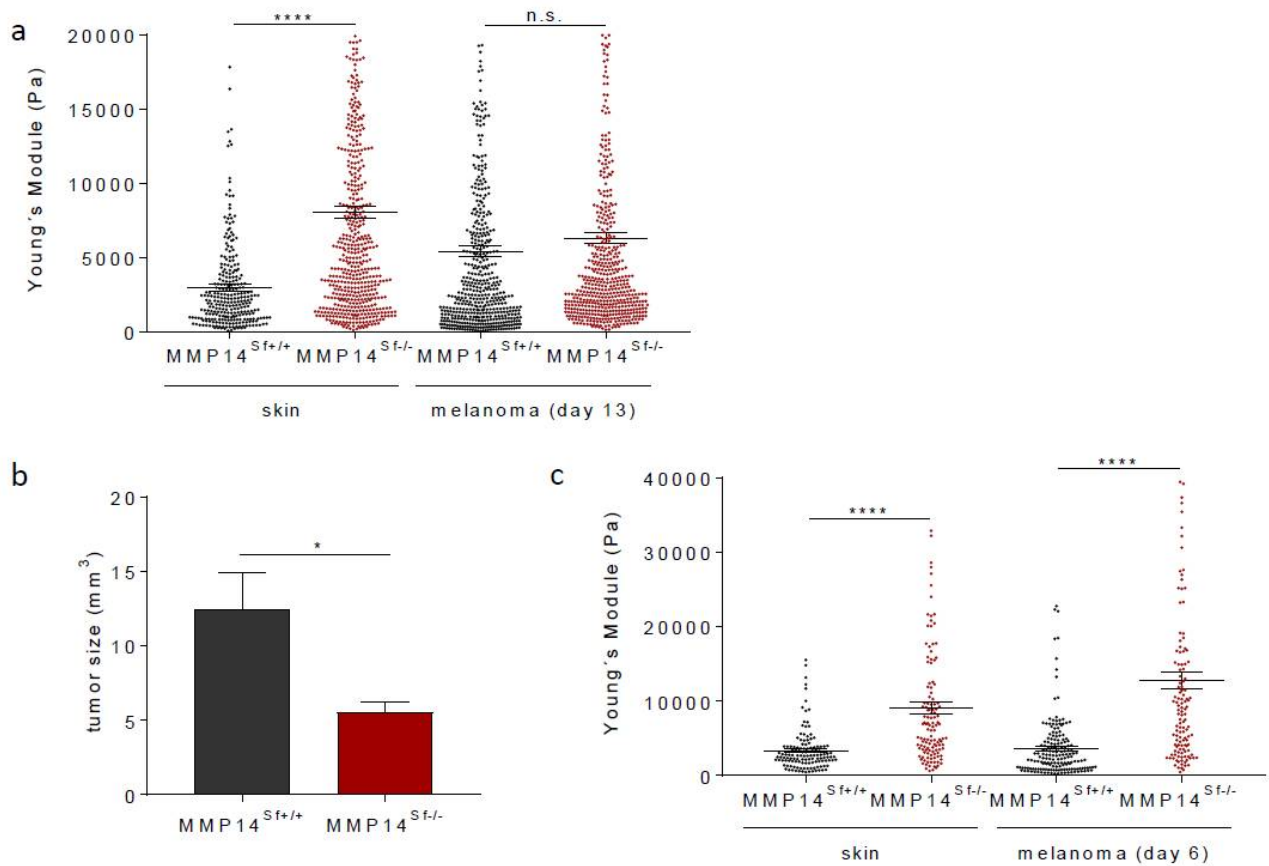

**Figure S5.** Atomic force microscopy (AFM) of peritumoral tissue (melanoma) and skin. **(a)** Analysis of tissue stiffness, Young's modulus values in melanomas at 13 days (200–500 tissue measurements per mouse, MMP14<sup>Sf+/+</sup>  $n = 7$ ; MMP14<sup>Sf-/-</sup>  $n = 7$ ). **(b)** Average tumor size (MMP14<sup>Sf+/+</sup>  $n = 8$ ; MMP14<sup>Sf-/-</sup>  $n = 7$ ) and **(c)** tissue stiffness (50–200 tissue measurements per mouse, MMP14<sup>Sf+/+</sup>  $n = 2$ ; MMP14<sup>Sf-/-</sup>  $n = 2$ ) at day 6 after melanoma intradermal injection. Note: \*  $p < 0.05$ ; \*\*\*\*  $p < 0.0001$ .

**Table S1.** Primers used for qPCR amplification.

| Gene         |     | Primer seq. (5'-3')      | amplified fragment |
|--------------|-----|--------------------------|--------------------|
| LOX          | for | AGCTACCTGGTGCCTGAATC     | 128bp              |
|              | rev | ACTGGGAAGTGGGCTTCTTT     |                    |
| LH2          | for | TTGTATTGCTGGTGGGCCT      | 144bp              |
|              | rev | GGTAGCGTTTCCAATGTGC      |                    |
| CD68         | for | AGCTGCCTGACAAGGGACAC     | 203bp              |
|              | rev | CGCTCCTTGGTGGCTTACAC     |                    |
| iNOS         | for | TGCTCCCTTCCGAAGTTTCT     | 153bp              |
|              | rev | ACTCTCTTGC GGACCATCTC    |                    |
| Arginase 1   | for | GCTTCGGAAGTCAACGGGAGGG   | 215bp              |
|              | rev | ACCAGAAAGGAAGTCTGGGATACA |                    |
| $\alpha$ SMA | for | CAGCGGGCATCCACGAA        | 218bp              |
|              | rev | CCCACCGATCCAGACAGA       |                    |
| S26          | for | AATGTGCAGCCCATTCGCTG     | 325 bp             |
|              | rev | CTTCGTCCTTACAAAACGG      |                    |
